# Supplementary material for: Targeted Next-Generation Sequencing in the Diagnosis of Facial Dysostoses
Source: Front Genet. 2020 Nov 11;11:580477. doi: 10.3389/fgene.2020.580477 (PMC7686794; doi:10.3389/fgene.2020.580477)
Supplement: Supplementary file 2 [file Table_1.xls]

## Sheet: Table 1 Facial dysostoses panel
Gene
ALDH1A1
ALPL
ALX1
ALX3
ALX4
BGLAP
BMP2
BMP4
BMP7
DHODH
DLX3
DLX5
DLX6
ECE1
EFNB1
EFTUD2
EHMT1
EVC
EVC2
FGFR1
FGFR2
FGFR3
GNAI3
GSC
HDAC8
LIFR
PAX1
PAX9
PDE4D
PLCB4
POLR1C
POLR1D
PRKAR1A
SF3B4
SRCAP
TCOF1
ZSWIM6
