# Supplementary material for: Targeted Next-Generation Sequencing in the Diagnosis of Facial Dysostoses
Source: Front Genet. 2020 Nov 11;11:580477. doi: 10.3389/fgene.2020.580477 (PMC7686794; doi:10.3389/fgene.2020.580477)
Supplement: Supplementary file 3 [file Table_2.xlsx]

## Sheet: Table 2_FD panel_intervals
Gene_Symbol	Chromosome	Chr_Start	Chr_End
ALDH1A1	chr9	75524513	75524680
ALDH1A1	chr9	75567846	75567921
ALDH1A1	chr9	75520869	75520953
ALDH1A1	chr9	75545790	75545940
ALDH1A1	chr9	75540395	75540533
ALDH1A1	chr9	75538930	75539053
ALDH1A1	chr9	75542027	75542098
ALDH1A1	chr9	75526869	75527043
ALDH1A1	chr9	75555059	75555173
ALDH1A1	chr9	75516119	75516201
ALDH1A1	chr9	75531831	75532025
ALDH1A1	chr9	75533631	75533743
ALDH1A1	chr9	75543803	75543942
ALPL	chr1	21889598	21889782
ALPL	chr1	21903010	21903139
ALPL	chr1	21887114	21887243
ALPL	chr1	21902221	21902422
ALPL	chr1	21887585	21887710
ALPL	chr1	21880570	21880640
ALPL	chr1	21900153	21900297
ALPL	chr1	21890529	21890714
ALPL	chr1	21894592	21894745
ALPL	chr1	21896793	21896872
ALPL	chr1	21903871	21904146
ALX1	chr12	85694928	85695258
ALX1	chr12	85677345	85677659
ALX1	chr12	85674035	85674270
ALX1	chr12	85680626	85680764
ALX4	chr11	44296893	44297213
ALX4	chr11	44331142	44331617
ALX4	chr11	44286399	44286738
ALX4	chr11	44289039	44289177
BGLAP	chr1	156212819	156212958
BGLAP	chr1	156212548	156212627
BGLAP	chr1	156212018	156212091
BGLAP	chr1	156212339	156212387
BMP2	chr20	6750769	6751124
BMP2	chr20	6758887	6759741
BMP4	chr14	54416745	54417611
BMP4	chr14	54418566	54418945
BMP7	chr20	55748251	55748371
BMP7	chr20	55803280	55803482
BMP7	chr20	55749982	55750068
BMP7	chr20	55758773	55758980
BMP7	chr20	55840756	55841183
BMP7	chr20	55746010	55746169
BMP7	chr20	55777526	55777684
DLX3	chr17	48068876	48069233
DLX3	chr17	48070759	48070959
DLX3	chr17	48072033	48072367
DLX5	chr7	96650043	96650382
DLX5	chr7	96651492	96651686
DLX5	chr7	96653576	96653940
DLX6	chr7	96639103	96639364
DLX6	chr7	96635285	96635730
DLX6	chr7	96636945	96637148
DHODH	chr16	72048367	72048576
DHODH	chr16	72057368	72057537
DHODH	chr16	72058039	72058103
DHODH	chr16	72045944	72046166
DHODH	chr16	72057059	72057222
DHODH	chr16	72042659	72042689
DHODH	chr16	72050918	72051010
DHODH	chr16	72055018	72055215
DHODH	chr16	72056256	72056379
ECE1	chr1	21562338	21562425
ECE1	chr1	21605679	21605932
ECE1	chr1	21553647	21553724
ECE1	chr1	21563234	21563342
ECE1	chr1	21582435	21582636
ECE1	chr1	21584013	21584088
ECE1	chr1	21586759	21586890
ECE1	chr1	21599187	21599409
ECE1	chr1	21616852	21616912
ECE1	chr1	21671864	21671876
ECE1	chr1	21548235	21548340
ECE1	chr1	21554419	21554539
ECE1	chr1	21564622	21564742
ECE1	chr1	21585181	21585337
ECE1	chr1	21616558	21616696
ECE1	chr1	21546443	21546629
ECE1	chr1	21551738	21551938
ECE1	chr1	21560046	21560159
ECE1	chr1	21571477	21571601
ECE1	chr1	21573709	21573861
EFNB1	chrX	68049615	68049752
EFNB1	chrX	68059502	68059604
EFNB1	chrX	68060080	68060502
EFNB1	chrX	68058455	68058742
EFNB1	chrX	68059798	68059936
EHMT1	chr9	140678553	140678607
EHMT1	chr9	140695327	140695441
EHMT1	chr9	140710394	140710519
EHMT1	chr9	140648618	140648748
EHMT1	chr9	140729220	140729410
EHMT1	chr9	140605414	140605487
EHMT1	chr9	140638349	140638547
EHMT1	chr9	140674082	140674174
EHMT1	chr9	140676738	140676854
EHMT1	chr9	140711886	140711982
EHMT1	chr9	140712507	140712595
EHMT1	chr9	140646778	140646865
EHMT1	chr9	140657122	140657277
EHMT1	chr9	140685295	140685427
EHMT1	chr9	140707833	140707987
EHMT1	chr9	140513476	140513506
EHMT1	chr9	140611073	140611639
EHMT1	chr9	140637818	140637985
EHMT1	chr9	140652327	140652468
EHMT1	chr9	140671065	140671301
EHMT1	chr9	140707453	140707630
EHMT1	chr9	140622796	140622986
EHMT1	chr9	140728796	140728981
EHMT1	chr9	140705908	140706072
EHMT1	chr9	140708878	140708965
EHMT1	chr9	140669556	140669709
EHMT1	chr9	140672329	140672512
EHMT1	chr9	140693260	140693371
EVC	chr4	5757986	5758094
EVC	chr4	5803672	5803826
EVC	chr4	5806452	5806573
EVC	chr4	5743438	5743546
EVC	chr4	5798744	5798964
EVC	chr4	5746926	5747073
EVC	chr4	5795330	5795449
EVC	chr4	5809923	5810059
EVC	chr4	5720970	5721105
EVC	chr4	5733147	5733389
EVC	chr4	5735073	5735167
EVC	chr4	5800308	5800524
EVC	chr4	5759803	5759857
EVC	chr4	5785274	5785496
EVC	chr4	5812061	5812182
EVC	chr4	5731029	5731122
EVC	chr4	5749870	5750038
EVC	chr4	5755507	5755665
EVC	chr4	5811240	5811343
EVC	chr4	5713103	5713286
EVC	chr4	5754558	5754784
EVC	chr4	5812675	5812769
EVC2	chr4	5577962	5578186
EVC2	chr4	5617144	5617276
EVC2	chr4	5664829	5664978
EVC2	chr4	5687092	5687211
EVC2	chr4	5624259	5624723
EVC2	chr4	5633515	5633764
EVC2	chr4	5692987	5693065
EVC2	chr4	5564570	5564847
EVC2	chr4	5586345	5586582
EVC2	chr4	5682982	5683045
EVC2	chr4	5696057	5696233
EVC2	chr4	5699315	5699379
EVC2	chr4	5576407	5576504
EVC2	chr4	5630281	5630466
EVC2	chr4	5710008	5710245
EVC2	chr4	5642236	5642570
EVC2	chr4	5690879	5691075
EVC2	chr4	5627471	5627640
EVC2	chr4	5667237	5667381
EVC2	chr4	5566980	5567091
EVC2	chr4	5570166	5570372
EVC2	chr4	5620200	5620414
FGFR1	chr8	38271141	38271327
FGFR1	chr8	38271665	38271812
FGFR1	chr8	38274819	38274939
FGFR1	chr8	38279310	38279464
FGFR1	chr8	38285434	38285616
FGFR1	chr8	38271431	38271546
FGFR1	chr8	38282022	38282222
FGFR1	chr8	38285859	38285958
FGFR1	chr8	38275741	38275896
FGFR1	chr8	38275383	38275514
FGFR1	chr8	38318609	38318629
FGFR1	chr8	38287195	38287471
FGFR1	chr8	38297819	38297895
FGFR1	chr8	38314869	38315057
FGFR1	chr8	38272292	38272424
FGFR1	chr8	38273383	38273583
FGFR1	chr8	38277046	38277258
FGFR1	chr8	38272072	38272152
FGFR1	chr8	38283635	38283768
FGFR2	chr10	123247500	123247632
FGFR2	chr10	123298101	123298234
FGFR2	chr10	123310799	123310978
FGFR2	chr10	123353218	123353336
FGFR2	chr10	123279488	123279688
FGFR2	chr10	123244904	123245051
FGFR2	chr10	123246863	123246943
FGFR2	chr10	123258004	123258124
FGFR2	chr10	123263299	123263460
FGFR2	chr10	123278191	123278348
FGFR2	chr10	123243207	123243322
FGFR2	chr10	123260335	123260466
FGFR2	chr10	123324947	123325223
FGFR2	chr10	123276828	123276982
FGFR2	chr10	123324011	123324098
FGFR2	chr10	123239366	123239540
FGFR2	chr10	123241681	123241696
FGFR2	chr10	123256041	123256241
FGFR2	chr10	123239090	123239189
FGFR2	chr10	123274626	123274838
FGFR3	chr4	1803557	1803757
FGFR3	chr4	1807773	1807905
FGFR3	chr4	1808838	1808994
FGFR3	chr4	1808268	1808415
FGFR3	chr4	1801469	1801544
FGFR3	chr4	1806052	1806252
FGFR3	chr4	1800976	1801255
FGFR3	chr4	1804636	1804796
FGFR3	chr4	1805414	1805568
FGFR3	chr4	1807281	1807401
FGFR3	chr4	1803089	1803268
FGFR3	chr4	1803342	1803475
FGFR3	chr4	1808551	1808666
FGFR3	chr4	1806546	1806701
FGFR3	chr4	1807077	1807208
FGFR3	chr4	1807979	1808059
FGFR3	chr4	1795657	1795775
FGFR3	chr4	1807472	1807672
GSC	chr14	95235993	95236357
GSC	chr14	95234823	95234991
GSC	chr14	95235290	95235559
HDAC8	chrX	71549899	71549931
HDAC8	chrX	71694541	71694584
HDAC8	chrX	71708778	71708896
HDAC8	chrX	71571578	71571693
HDAC8	chrX	71715001	71715123
HDAC8	chrX	71787730	71787885
HDAC8	chrX	71788599	71788739
HDAC8	chrX	71792496	71792616
HDAC8	chrX	71684404	71684586
HDAC8	chrX	71787602	71787651
HDAC8	chrX	71681849	71681953
HDAC8	chrX	71710774	71710861
HDAC8	chrX	71791902	71791964
GNAI3	chr1	110134660	110134860
GNAI3	chr1	110121821	110121988
GNAI3	chr1	110116513	110116664
GNAI3	chr1	110128833	110128972
GNAI3	chr1	110091338	110091465
GNAI3	chr1	110116354	110116406
GNAI3	chr1	110129346	110129509
GNAI3	chr1	110125054	110125192
LIFR	chr5	38496479	38496702
LIFR	chr5	38510561	38510825
LIFR	chr5	38523516	38523689
LIFR	chr5	38530603	38530754
LIFR	chr5	38481692	38482325
LIFR	chr5	38527252	38527401
LIFR	chr5	38489175	38489352
LIFR	chr5	38504073	38504228
LIFR	chr5	38482686	38482774
LIFR	chr5	38493703	38493892
LIFR	chr5	38499610	38499690
LIFR	chr5	38490287	38490398
LIFR	chr5	38506600	38506739
LIFR	chr5	38511887	38512071
LIFR	chr5	38502734	38502906
LIFR	chr5	38484872	38484975
LIFR	chr5	38485916	38486087
LIFR	chr5	38506002	38506181
LIFR	chr5	38528823	38528947
PLCB4	chr20	9318650	9318719
PLCB4	chr20	9401939	9402113
PLCB4	chr20	9404390	9404604
PLCB4	chr20	9416202	9416300
PLCB4	chr20	9424623	9424682
PLCB4	chr20	9459563	9459661
PLCB4	chr20	9353689	9353756
PLCB4	chr20	9370521	9370610
PLCB4	chr20	9449213	9449324
PLCB4	chr20	9288457	9288550
PLCB4	chr20	9352945	9353055
PLCB4	chr20	9382132	9382242
PLCB4	chr20	9438056	9438141
PLCB4	chr20	9351856	9351947
PLCB4	chr20	9360696	9360814
PLCB4	chr20	9371173	9371267
PLCB4	chr20	9374230	9374330
PLCB4	chr20	9424820	9424895
PLCB4	chr20	9457359	9457405
PLCB4	chr20	9319536	9319689
PLCB4	chr20	9346103	9346166
PLCB4	chr20	9388559	9388710
PLCB4	chr20	9389699	9389833
PLCB4	chr20	9417644	9417804
PLCB4	chr20	9440277	9440462
PLCB4	chr20	9453432	9453499
PLCB4	chr20	9453921	9454017
PLCB4	chr20	9433989	9434114
PLCB4	chr20	9317768	9317858
PLCB4	chr20	9364843	9365063
PLCB4	chr20	9368105	9368208
PLCB4	chr20	9385955	9386000
PLCB4	chr20	9389275	9389369
PLCB4	chr20	9343538	9343627
PLCB4	chr20	9376165	9376270
PLCB4	chr20	9391679	9391740
PLCB4	chr20	9400449	9400561
PAX9	chr14	37132097	37132733
PAX9	chr14	37131290	37131303
PAX9	chr14	37135662	37135811
PAX9	chr14	37145398	37145662
PDE4D	chr5	58571159	58571233
PDE4D	chr5	58652579	58652677
PDE4D	chr5	58270486	58270912
PDE4D	chr5	58271479	58271671
PDE4D	chr5	58286626	58286734
PDE4D	chr5	58295311	58295368
PDE4D	chr5	58481010	58481093
PDE4D	chr5	58882150	58882206
PDE4D	chr5	59064068	59064340
PDE4D	chr5	58287654	58287836
PDE4D	chr5	58476416	58476475
PDE4D	chr5	58511598	58511799
PDE4D	chr5	58273013	58273177
PDE4D	chr5	58284315	58284424
PDE4D	chr5	58285577	58285751
PDE4D	chr5	58289194	58289297
PDE4D	chr5	58334681	58334939
PDE4D	chr5	59188990	59189454
PDE4D	chr5	58272172	58272304
PDE4D	chr5	58489321	58489367
PDE4D	chr5	59284310	59284549
PDE4D	chr5	59481379	59481430
POLR1C	chr6	43485039	43485120
POLR1C	chr6	43488665	43488791
POLR1C	chr6	43488008	43488170
POLR1C	chr6	43487066	43487183
POLR1C	chr6	43488358	43488517
POLR1C	chr6	43487439	43487581
POLR1C	chr6	43487799	43487928
POLR1C	chr6	43484843	43484921
POLR1C	chr6	43488915	43489043
POLR1D	chr13	28196116	28196151
POLR1D	chr13	28197007	28197392
POLR1D	chr13	28222511	28222595
POLR1D	chr13	28239818	28240095
PRKAR1A	chr17	66520152	66520223
PRKAR1A	chr17	66521048	66521104
PRKAR1A	chr17	66526056	66526147
PRKAR1A	chr17	66525006	66525137
PRKAR1A	chr17	66518892	66519072
PRKAR1A	chr17	66526413	66526595
PRKAR1A	chr17	66511536	66511722
PRKAR1A	chr17	66547220	66547270
PRKAR1A	chr17	66519861	66519962
PRKAR1A	chr17	66521890	66522058
PRKAR1A	chr17	66523976	66524046
SRCAP	chr16	30720829	30721061
SRCAP	chr16	30723151	30723483
SRCAP	chr16	30723578	30723765
SRCAP	chr16	30715380	30715641
SRCAP	chr16	30718499	30718694
SRCAP	chr16	30723995	30724141
SRCAP	chr16	30740282	30740557
SRCAP	chr16	30732029	30732304
SRCAP	chr16	30748365	30751059
SRCAP	chr16	30727609	30727805
SRCAP	chr16	30733438	30733612
SRCAP	chr16	30733879	30734074
SRCAP	chr16	30740686	30740898
SRCAP	chr16	30747857	30747950
SRCAP	chr16	30712141	30712204
SRCAP	chr16	30718888	30719038
SRCAP	chr16	30722315	30722414
SRCAP	chr16	30731478	30731657
SRCAP	chr16	30732505	30732802
SRCAP	chr16	30745210	30745334
SRCAP	chr16	30722887	30723070
SRCAP	chr16	30724835	30725037
SRCAP	chr16	30747516	30747720
SRCAP	chr16	30724524	30724703
SRCAP	chr16	30745812	30745941
SRCAP	chr16	30721167	30721454
SRCAP	chr16	30722070	30722173
SRCAP	chr16	30727382	30727528
SRCAP	chr16	30734279	30734555
SRCAP	chr16	30734900	30736408
SRCAP	chr16	30744596	30744775
SRCAP	chr16	30744918	30745124
EFTUD2	chr17	42931919	42932055
EFTUD2	chr17	42934438	42934530
EFTUD2	chr17	42936443	42936554
EFTUD2	chr17	42937795	42937916
EFTUD2	chr17	42940076	42940279
EFTUD2	chr17	42942293	42942438
EFTUD2	chr17	42953297	42953473
EFTUD2	chr17	42959050	42959095
EFTUD2	chr17	42930659	42930763
EFTUD2	chr17	42963948	42964123
EFTUD2	chr17	42941018	42941155
EFTUD2	chr17	42956919	42957011
EFTUD2	chr17	42957917	42958017
EFTUD2	chr17	42937268	42937418
EFTUD2	chr17	42945170	42945270
EFTUD2	chr17	42929073	42929190
EFTUD2	chr17	42930880	42931008
EFTUD2	chr17	42932281	42932377
EFTUD2	chr17	42945650	42945723
EFTUD2	chr17	42929772	42929935
EFTUD2	chr17	42949809	42949943
EFTUD2	chr17	42961012	42961097
EFTUD2	chr17	42971780	42971894
EFTUD2	chr17	42928637	42928742
EFTUD2	chr17	42931632	42931729
EFTUD2	chr17	42960456	42960531
EFTUD2	chr17	42962619	42962707
PAX1	chr20	21689855	21690087
PAX1	chr20	21686346	21686641
PAX1	chr20	21695104	21695446
PAX1	chr20	21687071	21687710
PAX1	chr20	21689191	21689343
SF3B4	chr1	149895728	149895911
SF3B4	chr1	149899053	149899191
SF3B4	chr1	149895429	149895626
SF3B4	chr1	149897723	149897939
SF3B4	chr1	149898263	149898815
SF3B4	chr1	149899613	149899656
ZSWIM6	chr5	60768503	60768869
ZSWIM6	chr5	60821622	60821808
ZSWIM6	chr5	60825874	60826030
ZSWIM6	chr5	60831306	60831451
ZSWIM6	chr5	60786608	60786766
ZSWIM6	chr5	60837706	60837797
ZSWIM6	chr5	60628095	60628780
ZSWIM6	chr5	60822072	60822228
ZSWIM6	chr5	60834636	60834803
ZSWIM6	chr5	60827287	60827557
ZSWIM6	chr5	60817085	60817274
ZSWIM6	chr5	60835418	60835591
ZSWIM6	chr5	60839277	60840149
ZSWIM6	chr5	60790082	60790242
TCOF1	chr5	149771515	149771744
TCOF1	chr5	149777912	149778019
TCOF1	chr5	149778580	149778616
TCOF1	chr5	149749087	149749170
TCOF1	chr5	149755279	149755477
TCOF1	chr5	149755981	149756188
TCOF1	chr5	149769445	149769591
TCOF1	chr5	149737305	149737422
TCOF1	chr5	149763296	149763323
TCOF1	chr5	149740714	149740779
TCOF1	chr5	149754512	149754731
TCOF1	chr5	149751564	149751804
TCOF1	chr5	149753732	149753954
TCOF1	chr5	149754897	149755122
TCOF1	chr5	149755640	149755898
TCOF1	chr5	149758787	149758976
TCOF1	chr5	149772930	149773120
TCOF1	chr5	149748274	149748470
TCOF1	chr5	149758463	149758610
TCOF1	chr5	149767460	149767656
TCOF1	chr5	149771102	149771225
TCOF1	chr5	149772263	149772358
TCOF1	chr5	149743671	149743820
TCOF1	chr5	149747402	149747485
TCOF1	chr5	149754175	149754379
TCOF1	chr5	149759090	149759300
TCOF1	chr5	149775840	149776410
ALX3	chr1	110604052	110604190
ALX3	chr1	110607204	110607530
ALX3	chr1	110612953	110613239
ALX3	chr1	110603350	110603668
